# Supplementary material
Source: PubMed Central journal article supplement (PMC3778908)
Supplement: NIHMS509554-supplement-1.pdf [file NIHMS509554-supplement-1.pdf]

## Supplementary Figure S1

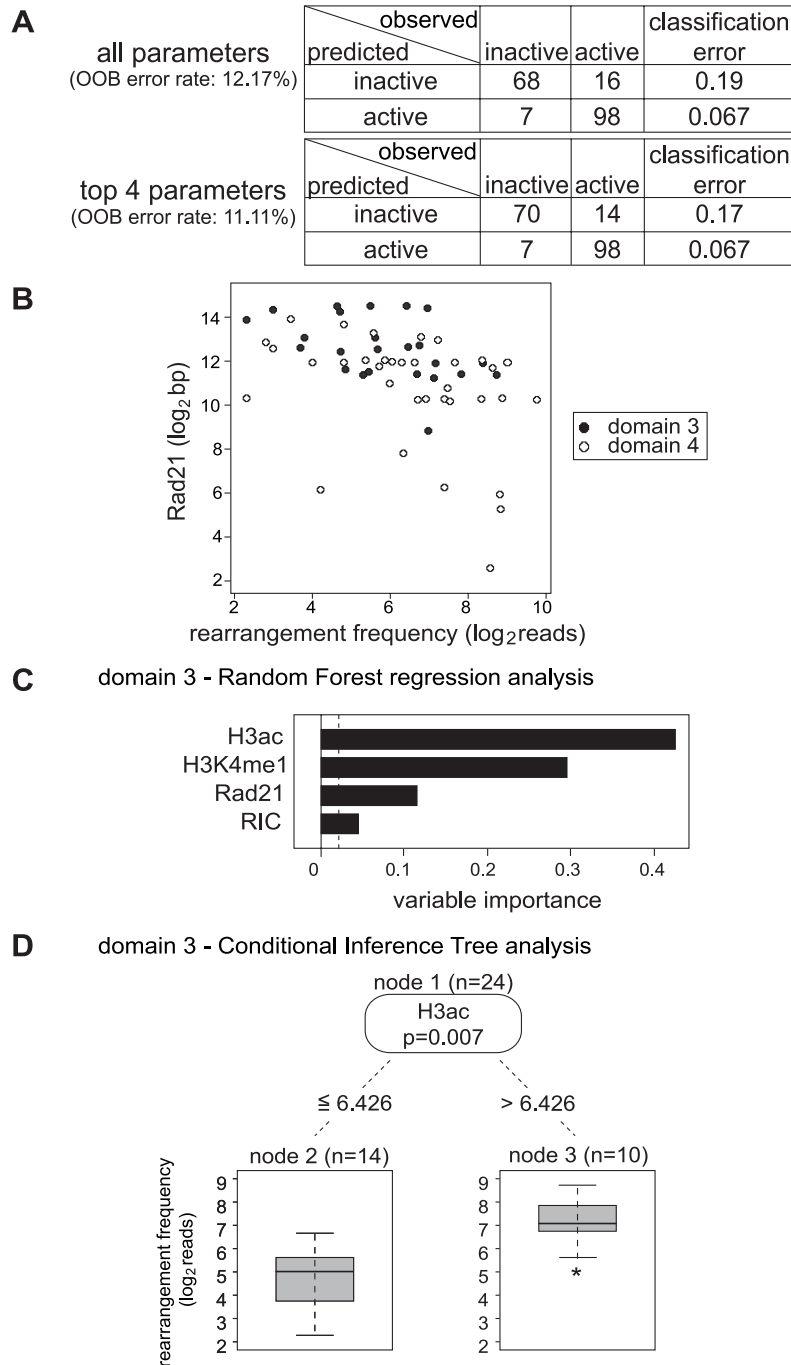

### Supplemental Fig. S1. Additional computational analysis results for accessibility elements

(A) Tables show the number of active vs. inactive genes, predicted vs. observed, when either all 12 parameters were used for classification or only the top 4 significant parameters. (B) Scatter plot for distance to Rad21 vs.  $V_H$  gene rearrangement frequency (both in  $\log_2$  scale) in domains 3 and 4 for active genes only. (C) Random Forest regression analysis for active genes in domain 3 showing the elements with significant variable importance. The dotted line indicates  $P$ -value = 0.05. (D) Conditional Inference Tree for domain 3. Box and whisker plots show the median, the lower and upper quartiles (25% and 75%), and the minimum and maximum values of rearrangement frequency for genes that had a signal intensity greater than or less and equal values to 6.426 ( $\log_2$ ) for H3ac.
