# Supplementary material
Source: PubMed Central journal article supplement (PMC3778908)
Supplement: NIHMS509554-supplement-2.pdf [file NIHMS509554-supplement-2.pdf]

**Supplemental Table S1.**

| V gene       | RSS sequence                               | RIC score | P/F  |
|--------------|--------------------------------------------|-----------|------|
| 7183.1PG.1   | cacaatgagcaaaaagtactgtgagctcaactaaaacc     | -30.24    | PASS |
| Q52.1PG.2    | cacctggggacaagcaacatcaccattagtccacacatc    | -71.34    | FAIL |
| 7183.2.3     | cacaatgagcaaaaagtactgtgagctcaactaaaacc     | -30.24    | PASS |
| Q52.2.4      | cacagtgaggggaagtccattatgaactgaacaaaatt     | -28.06    | PASS |
| 7183.4.6     | cacaatgagggaaatgttactgtgagctcaactaaaacc    | -29.54    | PASS |
| Q52.3.8      | cacaatgagagaagtccattgtgagcattcacaatact     | -43.94    | PASS |
| 7183.6PG.9   | cacacacatacacacacacacacacacacacacacac      | -69.41    | FAIL |
| 7183.7.10    | cacaatgagggaaatgttactgtgagctcaactaaaacc    | -29.54    | PASS |
| PG.1.11      | cactgggacacctcatacagagaattctgagtcagaac     | -74.53    | FAIL |
| Q52.4PG.12   | cacactaagggaactcccatttgagcataaaaaaaaaatt   | -44.18    | PASS |
| Q52.5.13     | cacagtgaggggaagtccattatgaactgaacaaaatt     | -28.06    | PASS |
| 7183.9.15    | cacagtgagtgaaatgttactgtgagctcaactaaaacc    | -27.03    | PASS |
| Q52.6PG.17   | cacactaagggaactcccatttgagcataaaaaaaaaaaa   | -48.07    | PASS |
| Q52.7.18     | cacagtgaggggaagtccattatgaacctgaacaaaatt    | -38.86    | PASS |
| 7183.12.20   | cacaatgagggaaatgttactgtgagctcaactaaaacc    | -29.54    | PASS |
| Q52.8.22     | cacagtgtgggaagtccaatgtgagcctgcacaaaact     | -26.51    | PASS |
| 7183.13PG.24 | cacagagaatggatgttgggtgggctcagaaacaacca     | -55.31    | PASS |
| 7183.14.25   | cacaatgagggaaatgttactgtgagctcaactaaaacc    | -29.54    | PASS |
| 7183.16.27   | cacagtgagtgaaatgttactatgagcttaacacaaaacc   | -42.57    | PASS |
| Q52.9.29     | cacagtgaggggaagtccaatgtgagcctgcacaaaact    | -25.18    | PASS |
| PG.6.32      | cactgggacacctcaaacagagaattctgagtcagaat     | -74.72    | FAIL |
| Q52.10.33    | cacagtgaggggaagtccaatgtgagcctgcacaaaact    | -25.18    | PASS |
| Q52.11.34    | cacagtgaaaaaagtccagtgtaacctgaacaaaagc      | -57.62    | PASS |
| 7183.18.35   | cacagtgagtgaaatgttactgtgaggacaagcacaaaact  | -41.24    | PASS |
| 7183.19.36   | cacagtgagtgaaatattactgtgagctaaaacacaaaacc  | -40.04    | PASS |
| 7183.20.37   | cacagtgagggactgttactgtgagctcaaacacaaaacc   | -40.44    | PASS |
| 7183.21PG.38 | cactgggacacctgcaaacagagaacacttttcagaaaac   | -73.24    | FAIL |
| Q52.12PG.39  | cactgagaaaaactcagctgagcctaaacaaaacaata     | -73.12    | FAIL |
| Q52.13.40    | cacagtgaggggaagtccagtgtaactgcacaaaaacc     | -32.24    | PASS |
| S107.1.42    | cacagtgagggagcgtcattgtgagcccagacacaaaacc   | -24.62    | PASS |
| S107.2PG.43  | cacagtgaggggtgagcctgaaacaaacctcattgca      | -39.35    | PASS |
| SM7.1.44     | cacagtctgcaaacacatcctgagagtgatcataaacca    | -38.08    | PASS |
| X24.1PG.45   | cacagtgagggaaatctcagttgtaccagacatgaacc     | -31.47    | PASS |
| 36-60.1.46   | cacagtgtggagtcttactgtgagcccagacaaaaacc     | -27.24    | PASS |
| VH11.1.48    | cacaatgaatggactcccgggtgaaactagacataaac     | -44.13    | PASS |
| SM7.2.49     | cacagtgtgcaaccacatcctgagtggtgcagaaacca     | -17.41    | PASS |
| X24.2.50     | cacagtgagggaaatctcagttttaccagacatgaacc     | -33.69    | PASS |
| 36-60.2PG.51 | cacagtgtggagtcttactgtgagcccagacaaaaacc     | -27.24    | PASS |
| VH11.2.53    | cacaatgaatggactccctgtgaaactagacataaac      | -41.3     | PASS |
| SM7.3.54     | cacagtgtgcaaccacatcctgagtggtgcagaaacca     | -17.41    | PASS |
| VH16.1.55    | cacagtgtgaaaagtgaattgtgagctcagacaaaacc     | -39.58    | PASS |
| VGAM3.8-1-57 | cacagtgtaaaaaccacatcctgaggggtgcagaaacca    | -29.5     | PASS |
| PG.11.58     | cacagtgagggacctttgtgagcccagacataaacct      | -50.66    | PASS |
| VGAM3.8-2-59 | cacagtgtgaaaaccacatcctgaggggtgcagaaacca    | -29.5     | PASS |
| PG.12.60     | cacagtgagggacctttgtgagcccagacataaacct      | -50.66    | PASS |
| VGAM3.8.3.61 | cacagtgtgaaaaccacatcctgaggggtgcaaaaacca    | -41.21    | PASS |
| S107.3.62    | cacagtgaggggtacttctcagtgtagcctagacacaaaacc | -21.82    | PASS |
| SM7.4.63     | cacagtctgcaaccacatcctgagagtgatcagaaacca    | -26.2     | PASS |
| 36-60.3.64   | cacaatgtggagtcttactgtgagcccagacataaac      | -29.3     | PASS |
| S107.4.65    | cacagcgaggggtacttctcagtgtagcctgaaaaaac     | -25.26    | PASS |
| 36-60.4.66   | cacagtattgagctccagtgtagcccagacaaaaacc      | -29.17    | PASS |
| 36-60.5.67   | cacagtgtggaatcttactgtgagcccagatgtaaac      | -38.03    | PASS |
| 3609N.1PG.68 | cacagtgagggatagataaactgtgtaacccaaacaca     | -57.51    | PASS |
| 36-60.6.70   | cacagtgtggagtcttactgtgagcccagacataaac      | -29.19    | PASS |
| VGAM3.8-4-71 | cacagtgtgaaaaccacatcctgagtggtgcagaaacca    | -27.37    | PASS |
| 36-60.7PG.72 | cacaaggtgtgtcttactgtgagcccagaaataaac       | -34.82    | PASS |

|               |                                         |        |      |
|---------------|-----------------------------------------|--------|------|
| PG.14.73      | cacagtgaggaaattaaactgtgagttcagacacaaaac | -42.38 | PASS |
| 36-60.8.74    | cacagtgaggagcttcagtgtaggcccagacataaac   | -31.76 | PASS |
| 3609N.2.77    | cacactgtggggccatcaatgagaacccatacaciaaac | -31.24 | PASS |
| VH12.1.78     | cacaatgagaagattccaatgtcaaccacacaciaaac  | -29.11 | PASS |
| J606.1.79     | cacagtgagaagcttcattgtgagctagacacaaact   | -30.29 | PASS |
| J606.2.80     | cacagtaagaagccttcattgtgaatctatccaccaacc | -50.06 | PASS |
| J606.3.81     | cacagtgagaagccttcattgtgaatacatccacaaacc | -40.12 | PASS |
| J606.4.82     | cacagtgagaagccttattatgaacctatccacaaacc  | -43.91 | PASS |
| J606.5.83     | cacagtgagaagcttcattgtgatcctagacacaaacc  | -34.96 | PASS |
| 3609.1.84     | cacagtggtgcaaccgtgaccacagctgtgcaatatt   | -50.82 | PASS |
| J558.1.85     | cacagtggtgaccacatcctgagtgatgcagaaaact   | -29.9  | PASS |
| VH10.1.86     | cacagtggtgaatcttcagtgtagcctagacaciaaac  | -26.54 | PASS |
| PG.17.87      | cacatgtagaaagaaaggcagagaggggtgcatgtcat  | -70.07 | FAIL |
| J558.2.88     | cacagtggtgcaaccacatcccactgtgtagaaaacc   | -21.85 | PASS |
| J558.3.90     | cacagtggtgaccacatcctgagtgtagaaaact      | -19.5  | PASS |
| VH10.3.91     | cacagtggtgaatcttcagtgtagcctagacaciaaac  | -26.54 | PASS |
| PG.18.92      | cacatgtagaaagaaaggcagagtgatggcattgtcca  | -72.9  | FAIL |
| J558.4.93     | cacagtggtgcaaccacatcccactgtgtagaaaacc   | -21.85 | PASS |
| J558.5PG.94   | cactgtgttacaaccacatactgattgtgtagaaaacc  | -32.63 | PASS |
| VH15.1.95     | cacagtgtaacagctcatatctgaagcagtgcaaaaagt | -54.74 | PASS |
| J558.6.96     | cacagtggtgaaccacatcctgagtgtagaaaact     | -18.52 | PASS |
| J558.8.98     | cacagtgctacaaccacatcctgagtgtagaaaacca   | -22    | PASS |
| J558.9.99     | cacagtggtgaccacatcctgagtgtagaaaacc      | -16.92 | PASS |
| J558.10PG.100 | cacagtggtgaaaccacatcctgagagtgtagaaaacc  | -18.37 | PASS |
| J558.11PG.101 | cacagtggtgaaaccacatcccgaatgtgtagaaaacc  | -37.85 | PASS |
| J558.12.102   | cacagtggtgaaaccacatcctgactgtgtagaaaacc  | -19.75 | PASS |
| J558.13.103   | cacagtgctgcaaccacatcctgagtgtagaaaacc    | -20.96 | PASS |
| J558.15PG.105 | cacagtggtgaaaccacagcctgagtgtagaaaact    | -18.93 | PASS |
| J558.16.106   | cacagtgctacaacacatcctgagtgtagaaaacc     | -21.33 | PASS |
| J558.17PG.107 | cacagtggtataaccacatcctgtgtgtagaaaacc    | -46.6  | PASS |
| J558.18.108   | cacagtgctacaacacatcctgagtgtagaaaact     | -22.65 | PASS |
| J558.19.109   | cactgtactacaacacatccttagtgtagaaaact     | -33.31 | PASS |
| J558.20PG.110 | cacagtgctacaacacatcctgagtgtagaaaacca    | -22.16 | PASS |
| J558.21PG.111 | cacagtggtgaaaccacagcctgagtgtagaaaact    | -29.04 | PASS |
| J558.22.112   | cacagtgctacaacacatcctcagtgtagaaaacc     | -23.61 | PASS |
| J558.23.113   | cacagtggtgaaaccacatcctgactgtgtagaaaacc  | -19.75 | PASS |
| J558.24PG.114 | cacactcctgagtgtagaaaaccctggaggagaggag   | -75.72 | FAIL |
| J558.25PG.115 | cacagtggtgaaaccacatctgagtgtagaaaacc     | -20.18 | PASS |
| J558.26.116   | cacagtgctacaacacatcctgagtgtagaaaacc     | -20.08 | PASS |
| J558.27PG.117 | caaagtgtataaccacatcctgtgtgtagaaaacc     | -37.33 | PASS |
| J558.28PG.118 | cacagtggtgaaaccacatcctgagtgtagaaaacc    | -23.44 | PASS |
| J558.29PG.119 | cacatcatgagtgtagtagaatcccggaggaggcaca   | -74.21 | FAIL |
| J558.30PG.120 | cacagtggtgaaaccatcctgagtgtagaaaaca      | -21.77 | PASS |
| J558.31.121   | cacagtgctacaacacatcctgagtgtagaaaacc     | -20.08 | PASS |
| J558.32PG.122 | cacagtgctacaacacatcctgagagtgtagaaaacc   | -23.2  | PASS |
| J558.33PG.123 | cacagtgctacaacagcctcctgagtgtagaaaact    | -28.36 | PASS |
| J558.34.124   | cacagtgctacaacacatcctgagtgtagaaaacc     | -21.18 | PASS |
| J558.35PG.125 | cacatcctgtgtgtagaaaaccctggaggtagagaa    | -71.21 | FAIL |
| J558.36.126   | cacagtgctacaacacatcctgagtgtagaaaact     | -22.65 | PASS |
| J558.37.127   | cactgtactacaacacatccttagtgtagaaaact     | -33.31 | PASS |
| J558.38PG.128 | cacagtggtataaccacatcctgtatgatacaaaaact  | -39.13 | PASS |
| J558.39.129   | cacagtggtgaaaccacatcctgagtgtagaaaacc    | -17.39 | PASS |
| J558.40PG.130 | cacagtgctgcaaccacatcctgagtgtagaaaacc    | -18.79 | PASS |
| J558.41PG.131 | cagtgctgtaaccacatcccagtgtagtaatactg     | -74.04 | FAIL |
| J558.42.132   | cacagtggtgaaaccacatcctgaatgtgtagaaaacc  | -18.59 | PASS |
| J558.43.133   | cacagtgctacaacacacccctgagtgtagaaaaca    | -42.07 | PASS |
| J558.44PG.134 | cacagtggtgaaaccacatcccagagtgtagaaaacc   | -61.46 | FAIL |
| J558.45PG.135 | cacattctgaatgtgtagaaaactggaggagcatgaa   | -72.54 | FAIL |
| J558.46PG.136 | cacagtggtataagcacatcctgtgtgtagaaaacc    | -42.05 | PASS |

|               |                                            |        |      |
|---------------|--------------------------------------------|--------|------|
| J558.47.137   | cacagtggtgaaccacatcctgtgtgtgcaaaaacc       | -29.81 | PASS |
| 3609.3.139    | cacattgacacagagtcagtttacagctgtgcaatagtt    | -52.42 | PASS |
| J558.48PG.140 | cacagtggtataaaatcacatcctgagtgaggacagaaactc | -42.28 | PASS |
| J558.49.141   | cacagtggtataaaccacatcctgagtggtcagaaactc    | -19.64 | PASS |
| 3609.4.142    | cacattgtcatagcctcagttatcagctgtatagtaatt    | -54.93 | PASS |
| J558.50.143   | cacagtggtgaaccacatcctgagagtgtcagaaacc      | -16.49 | PASS |
| J558.51PG.144 | cacagtggttaaccataacctgagtggtccataaactc     | -34.1  | PASS |
| J558.52.145   | cacagtggtgaaccacatcctgagagtgtcagaaacc      | -17.23 | PASS |
| J558.53.146   | cacagtggtgaaccacatcctgagagtgtcagaaacc      | -16.49 | PASS |
| J558.54.148   | cacagtggtgaaccacatcctgagtggtcagaaacc       | -16.07 | PASS |
| J558.55.149   | cacagtggtgaaccacatcctgagagtgtcagaaacc      | -28.21 | PASS |
| J558.56.150   | cacagtggtacaaccatcctgagtggtcagaaacac       | -21.6  | PASS |
| 3609.6PG.151  | cacattgacacagcctcagtttcatctgtacattattt     | -51.56 | PASS |
| J558.57PG.152 | catagtggttcaaccacaacctgagtggtaccataaactc   | -39.76 | PASS |
| 3609.7.153    | cacattgtcacagcctcagttataagctgtacagtaatt    | -52.69 | PASS |
| J558.58.154   | cacagtggttaaccacatcctgagtgagtcagaaacac     | -23.51 | PASS |
| J558.59.155   | cacagtggtgaaccacatcctgagagtgtcagaaacc      | -16.49 | PASS |
| J558.61.157   | cacagcgttgtaaccacatcctgagagtgtcagaaacc     | -19.25 | PASS |
| J558.62PG.158 | cacagtggtgaaccacaacctgagagtgtcagaaacc      | -28.21 | PASS |
| J558.63PG.159 | cagtggtgaaccacatcctgagtggtcagaaaccctg      | -74.37 | FAIL |
| J558.64.162   | cacagtggtgaaccacatcccagtggtcagaaacc        | -18.5  | PASS |
| J558.65.163   | cacagtggtgaaccacatcctgagagtgtcagaaacc      | -16.49 | PASS |
| J558.66.165   | cacagtggtgaaccacatcctgagtggtcagaaacc       | -15.33 | PASS |
| J558.67.166   | cacagtggtgaaccacatcctgagagtggtcagaaacc     | -28.21 | PASS |
| 3609.10PG.167 | cacagccccagttttagctgtacagttatcaggctgg      | -75.44 | FAIL |
| 3609.11.169   | cacattgtcacagcctcagttataagctgtacagtaatt    | -52.69 | PASS |
| J558.69.170   | cacagtggtgaaccacatcccagtggtcagaaacc        | -18.5  | PASS |
| J558.70PG.171 | cacagtggtgaaccacatcctgagtggtcacaaaacc      | -27.78 | PASS |
| J558.72.173   | cacagtggtgaaccacatcctgagagtgtcagaaacc      | -16.49 | PASS |
| 3609.12.174   | cacattgatacagcttaagttttagctgtacagttatt     | -57.25 | PASS |
| J558.73PG.175 | cacagtggtgaaccacatcctgagtggtcagaaacc       | -16.07 | PASS |
| J558.74.176   | cacagtggtgaaccacatcccagtggtcagaaacc        | -18.5  | PASS |
| J558.75.177   | cacagtggtgaaccacatcctgagagtgtcagaaacc      | -17.81 | PASS |
| J558.76PG.179 | cacagtggtgaaccacatcctgagtggtcagaaacc       | -16.07 | PASS |
| J558.77.180   | cacagtggtgaaccacatcctgagagtgtcagaaacc      | -17.23 | PASS |
| J558.78.182   | cacagtggtacaaccacatcctgagtggtcagaaacc      | -16.45 | PASS |
| 3609.15PG.183 | catagcctcagttttagctgtacagttatcaggctgg      | -81.1  | FAIL |
| J558.79.184   | cacagtggtacaaccacatcctgagtggtcagaaacc      | -16.45 | PASS |
| J558.80.186   | cacagtggtgaaccacatcctgagtggtcagaaacac      | -18.91 | PASS |
| J558.81.187   | cacagtggtgaaccacatcctgagtggtcagaaacc       | -16.07 | PASS |
| J558.82PG.188 | cacagtggtgaaccacatcctgagtggtcagaaacc       | -18.37 | PASS |
| J558.83.189   | cacagtggtgaaccacatcctgagtggtcagaaatcc      | -16.42 | PASS |
| J558.84.190   | cacagtggtgaaccacatcctgagtggtcagaaacc       | -17.39 | PASS |
| J558.85.191   | cacagtggtacaaccacatcctgagagtgtcagaaaccg    | -20.59 | PASS |
| J558.86.192   | cacagtggtgaaccacatcctgagtggtcagaaatcc      | -17.16 | PASS |
| J558.87.193   | cacagtggtacaaccacatcctgagtggtcagaaacc      | -16.45 | PASS |
| J558.88.194   | cacagtggtgaaccacatcctgagtggtcagaaatcc      | -17.16 | PASS |
| J558.89PG.195 | cacagtggtacaaccacatcctgagtggtcagaaacc      | -20.08 | PASS |

### Supplemental Table S1. $V_H$ gene RIC scores

All predicted RSS sequences and RIC scores by DNAGrab for  $V_H$  genes are listed. A pass score for an RSS is  $RIC \geq -58.45$ .
